# Supplementary material
Source: MDPI journal article supplement (https://www.mdpi.com/2312-7481/7/10/135)
Supplement: s1 [file s1]

## Supplementary Materials to:

# Magnetic field perturbations to a soft X-ray activated Fe (II) molecular spin state transition

Guanhua Hao,<sup>1,2</sup> Alpha T. N'Diaye,<sup>2\*</sup> Thilini K. Ekanayaka,<sup>1</sup> Ashley S. Dale,<sup>3</sup> Xuanyuan Jiang,<sup>1</sup> Esha Mishra,<sup>1</sup> Corbyn Mellinger,<sup>1</sup> Saeed Yazdani,<sup>3</sup> John Freeland,<sup>4</sup> Jian Zhang,<sup>5</sup> Ruihua Cheng,<sup>3\*</sup> Xiaoshan Xu,<sup>1</sup> Peter A. Dowben<sup>1\*</sup>

<sup>1</sup> Department of Physics and Astronomy, University of Nebraska-Lincoln, Lincoln, NE 68588-0299, U.S.A.; guanhua hao@huskers.unl.edu, thiliniekanayaka@huskers.unl.edu, neojxy@gmail.com, emishra@huskers.unl.edu, corbyn.mellinger@huskers.unl.edu, xiaoshan.xu@unl.edu, pdowben1@unl.edu

<sup>2</sup> Advanced Light Source, Lawrence Berkeley National Laboratory, Berkeley, CA 94720, U.S.A.; ghao@lbl.gov, atndiaye@lbl.gov

<sup>3</sup> Physics Department, Indiana University Purdue University-Indianapolis, Indianapolis, IN 46202, U.S.A.; daleas@iupui.edu, syazdani@iupui.edu, rucheng@iupui.edu

<sup>4</sup> Argonne National Laboratory, Advanced Photon Source, Bldg. 431/E003, 9700 South Cass Ave., Argonne IL 60439, U.S.A.; freeland@anl.gov

<sup>5</sup> Molecular Foundry, Lawrence Berkeley National Laboratory, Berkeley, CA 94720, U.S.A.; JianZhang@lbl.gov

\* Correspondence: pdowben1@unl.edu; Tel.: +1-402-472-9838 (PAD); atndiaye@lbl.gov; Tel.: +1-510-486-5926 (ATN); rucheng@iupui.edu; Tel.: +1-317-274-6902 (RC)

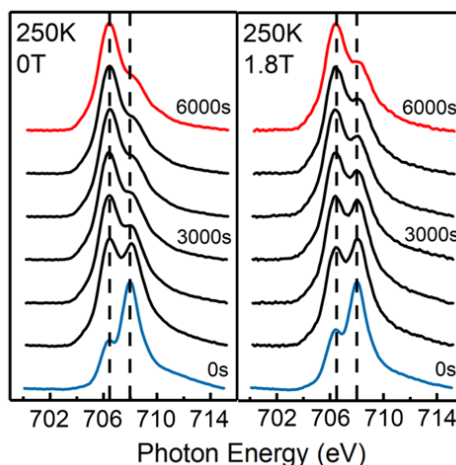

*Figure S1. The time evolution of the X-ray absorption spectra with and without an applied 1.8T magnetic field of  $[\text{Fe}\{\text{H}_2\text{B}(\text{pz})_2\}_2(\text{bipy})]$ , under a constant incident X-ray fluence at 250 K. The spectra in blue are indicative of the low spin state, while the spectra in red are largely indicative of the high spin state.*

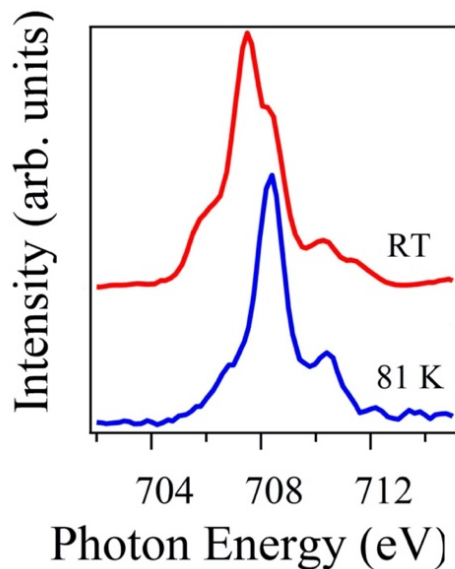

Figure S2. Higher resolution X-ray absorption spectra showing an example of reference spectra for the high spin state and low spin state of  $[\text{Fe}\{\text{H}_2\text{B}(\text{pz})_2\}_2(\text{bipy})]$  above and below the accepted spin transition temperature in the region of 160 K. The reference spectra provide a facile mechanism for ascertaining spin state occupancy.

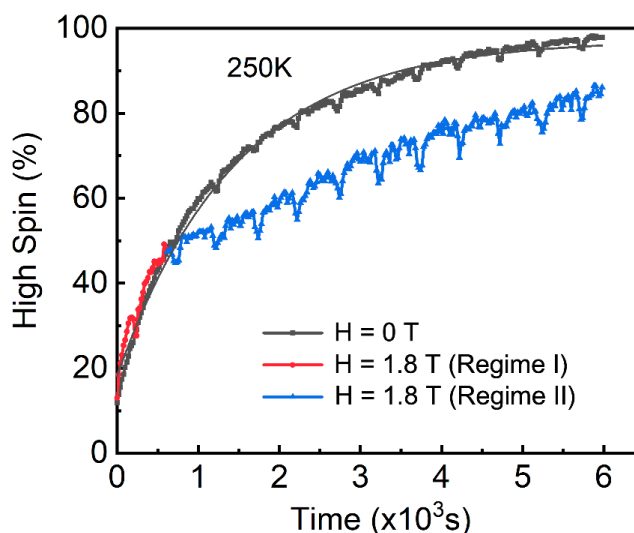

Figure S3. The evolution of the high spin state occupancy in the  $[\text{Fe}\{\text{H}_2\text{B}(\text{pz})_2\}_2(\text{bipy})]$  molecular thin film that accompany an incident soft X-ray fluence at 250 K, in the absence of an applied magnetic field (black) as well as in the presence of a 1.8 T applied magnetic field (red and blue). Exponential fit to the high spin state conversion in the field-free case is indicated as a thin solid black line.
